# Supplementary material for: Close linkage between serum uric acid and cardiac dysfunction in patients with ischemic heart disease according to covariance structure analysis
Source: PubMed Central journal article supplement (PMC5449391; doi:10.1038/s41598-017-02707-y), 2017-05-30

## **Supplementary Information**

### **Close linkage between serum uric acid and cardiac dysfunction in patients with ischemic heart disease according to covariance structure analysis**

Yoshiro Tanaka, Tomohisa Nagoshi, Makoto Kawai, Goki Uno, Satoshi Ito, Akira Yoshii, Haruka Kimura, Yasunori Inoue, Kazuo Ogawa, Toshikazu D. Tanaka, Kosuke Minai Takayuki Ogawa, Michihiro Yoshimura

**Supplementary Table S1. The results of the multiple regression analysis to identify the clinical factors influencing the LVEF value**

| R <sup>2</sup> =0.083 | Non-Standard Coefficient |                | Standard Regression Coefficient | Test statistic | P-value | 95% CI           | VIF   |
|-----------------------|--------------------------|----------------|---------------------------------|----------------|---------|------------------|-------|
|                       | Regression Coefficient   | Standard Error |                                 |                |         |                  |       |
| Age                   | 0.157                    | 0.034          | 0.161                           | 4.589          | < 0.001 | 0.090 to 0.224   | 1.555 |
| Gender                | -1.526                   | 0.920          | -0.051                          | -1.658         | 0.098   | -3.331 to 0.280  | 1.190 |
| BMI                   | 0.317                    | 0.085          | 0.117                           | 3.738          | < 0.001 | 0.151 to 0.483   | 1.238 |
| eGFR                  | 0.113                    | 0.021          | 0.182                           | 5.438          | < 0.001 | 0.072 to 0.154   | 1.421 |
| UA                    | -0.762                   | 0.243          | -0.098                          | -3.137         | 0.002   | -1.238 to -0.285 | 1.232 |
| TG                    | 0.009                    | 0.003          | 0.091                           | 3.083          | 0.002   | 0.003 to 0.014   | 1.117 |
| AO sys                | 0.046                    | 0.013          | 0.106                           | 3.574          | < 0.001 | 0.021 to 0.071   | 1.110 |
| HbA1c                 | -1.399                   | 0.309          | -0.132                          | -4.526         | < 0.001 | -2.006 to -0.793 | 1.085 |
| Smoking               | -0.970                   | 0.446          | -0.066                          | -2.175         | 0.030   | -1.845 to -0.095 | 1.159 |
| constant              | 40.957                   | 4.863          | -                               | 8.422          | < 0.001 | 31.416 to 50.499 | -     |

R<sup>2</sup>: adjusted coefficient of determination, CI: confidence interval, VIF: variance inflation factor.

LVEF, left ventricular ejection fraction; BMI, body mass index; eGFR, estimated glomerular filtration rate; UA, uric acid; TG, triglycerides; AO sys, Systolic blood pressure in the Aorta; HbA1c, hemoglobin A1c

**Supplementary Table S2. The results of the multiple regression analysis to identify the clinical factors influencing with or without the vessel disease**

| R <sup>2</sup> =0.070 | Non-Standard Coefficient |                | Standard Regression Coefficient | Test statistic | P-value | 95% CI           | VIF   |
|-----------------------|--------------------------|----------------|---------------------------------|----------------|---------|------------------|-------|
|                       | Regression Coefficient   | Standard Error |                                 |                |         |                  |       |
| Age                   | 0.008                    | 0.003          | 0.085                           | 2.446          | 0.015   | 0.002 to 0.014   | 1.600 |
| Gender                | 0.071                    | 0.084          | 0.025                           | 0.841          | 0.400   | -0.094 to 0.235  | 1.186 |
| BMI                   | -0.015                   | 0.008          | -0.059                          | -1.912         | 0.056   | -0.030 to 0.000  | 1.239 |
| eGFR                  | -0.004                   | 0.002          | -0.080                          | -2.381         | 0.017   | -0.008 to -0.001 | 1.509 |
| UA                    | 0.054                    | 0.021          | 0.078                           | 2.536          | 0.011   | 0.012 to 0.096   | 1.247 |
| TG                    | -0.001                   | 0.000          | -0.062                          | -2.137         | 0.033   | -0.001 to 0.000  | 1.112 |
| AO sys                | 0.004                    | 0.001          | 0.099                           | 3.374          | 0.001   | 0.002 to 0.006   | 1.132 |
| HbA1c                 | 0.159                    | 0.028          | 0.161                           | 5.609          | < 0.001 | 0.104 to 0.215   | 1.090 |
| Smoking               | 0.067                    | 0.041          | 0.048                           | 1.637          | 0.102   | -0.013 to 0.147  | 1.157 |
| constant              | -0.924                   | 0.441          | -                               | -2.098         | 0.036   | -1.789 to -0.060 | -     |

R<sup>2</sup>: adjusted coefficient of determination, CI: confidence interval, VIF: variance inflation factor.

BMI, body mass index; eGFR, estimated glomerular filtration rate; UA, uric acid; TG, triglycerides; AO sys, Systolic blood pressure in the Aorta; HbA1c, hemoglobin A1c

**Supplementary Table S3. The results of the multiple regression analysis to identify the clinical factors influencing the UA level**

| R <sup>2</sup> =0.189 | Non-Standard Coefficient |                | Standard Regression Coefficient | Test statistic | P-value | 95% CI           | VIF   |
|-----------------------|--------------------------|----------------|---------------------------------|----------------|---------|------------------|-------|
|                       | Regression Coefficient   | Standard Error |                                 |                |         |                  |       |
| Age                   | -0.013                   | 0.004          | -0.105                          | -3.161         | 0.002   | -0.021 to -0.005 | 1.570 |
| Gender                | 0.543                    | 0.110          | 0.141                           | 4.935          | < 0.001 | 0.327 to 0.758   | 1.168 |
| BMI                   | 0.053                    | 0.010          | 0.153                           | 5.235          | < 0.001 | 0.033 to 0.073   | 1.224 |
| eGFR                  | -0.026                   | 0.002          | -0.322                          | -10.565        | < 0.001 | -0.030 to -0.021 | 1.329 |
| TG                    | 0.002                    | 0.000          | 0.150                           | 5.406          | < 0.001 | 0.001 to 0.002   | 1.099 |
| AO sys                | -0.004                   | 0.002          | -0.067                          | -2.395         | 0.017   | -0.007 to -0.001 | 1.117 |
| HbA1c                 | -0.089                   | 0.038          | -0.066                          | -2.372         | 0.018   | -0.163 to -0.015 | 1.099 |
| Smoking               | 0.088                    | 0.054          | 0.046                           | 1.628          | 0.104   | -0.018 to 0.193  | 1.161 |
| LVEF                  | -0.011                   | 0.004          | -0.086                          | -3.137         | 0.002   | -0.018 to -0.004 | 1.090 |
| constant              | 8.274                    | 0.553          | -                               | 14.958         | < 0.001 | 7.189 to 9.360   | -     |

R<sup>2</sup>: adjusted coefficient of determination, CI: confidence interval, VIF: variance inflation factor.

UA, uric acid; BMI, body mass index; eGFR, estimated glomerular filtration rate; TG, triglycerides; AO sys, Systolic blood pressure in the Aorta; HbA1c, hemoglobin A1c; LVEF, left ventricular ejection fraction

**Supplementary Table S4. The results of Pearson's product-moment correlation coefficient analysis among the clinical factors**

|         | Age                  | Gender               | BMI                  | TG                   | Smoking              | AO sys               | eGFR                 | HbA1c               | UA                   |
|---------|----------------------|----------------------|----------------------|----------------------|----------------------|----------------------|----------------------|---------------------|----------------------|
| Age     | -                    | -0.205 <sup>**</sup> | -0.255 <sup>**</sup> | -0.174 <sup>**</sup> | -0.186 <sup>**</sup> | 0.223 <sup>**</sup>  | -0.462 <sup>**</sup> | 0.075 <sup>**</sup> | -0.044               |
| Gender  | -0.205 <sup>**</sup> | -                    | 0.137 <sup>**</sup>  | 0.055 <sup>**</sup>  | 0.274 <sup>**</sup>  | -0.208 <sup>**</sup> | 0.091 <sup>**</sup>  | 0.016               | 0.165 <sup>**</sup>  |
| BMI     | -0.255 <sup>**</sup> | 0.137 <sup>**</sup>  | -                    | 0.175 <sup>**</sup>  | 0.039                | 0.025                | 0.032                | 0.199 <sup>**</sup> | 0.185 <sup>**</sup>  |
| TG      | -0.174 <sup>**</sup> | 0.055 <sup>*</sup>   | 0.175 <sup>**</sup>  | -                    | 0.187 <sup>**</sup>  | 0.050                | 0.052                | 0.098 <sup>**</sup> | 0.166 <sup>**</sup>  |
| Smoking | -0.186 <sup>**</sup> | 0.274 <sup>**</sup>  | 0.039                | 0.187 <sup>**</sup>  | -                    | -0.048               | 0.131 <sup>**</sup>  | 0.070 <sup>**</sup> | 0.079 <sup>**</sup>  |
| AO sys  | 0.223 <sup>**</sup>  | -0.208 <sup>**</sup> | 0.025                | 0.050                | -0.048               | -                    | -0.194 <sup>**</sup> | 0.053               | -0.064 <sup>*</sup>  |
| eGFR    | -0.462 <sup>**</sup> | 0.091 <sup>**</sup>  | 0.032                | 0.052                | 0.131 <sup>**</sup>  | -0.194 <sup>**</sup> | -                    | 0.029               | -0.287 <sup>**</sup> |
| HbA1c   | 0.075 <sup>**</sup>  | 0.016                | 0.199 <sup>**</sup>  | 0.098 <sup>**</sup>  | 0.070 <sup>**</sup>  | 0.053                | 0.029                | -                   | -0.034               |
| UA      | -0.044               | 0.165 <sup>**</sup>  | 0.185 <sup>**</sup>  | 0.166 <sup>**</sup>  | 0.079 <sup>**</sup>  | -0.064 <sup>*</sup>  | -0.287 <sup>**</sup> | -0.034              | -                    |

BMI, body mass index; TG, triglycerides; AO sys, Systolic blood pressure in the Aorta; eGFR, estimated glomerular filtration rate; HbA1c, hemoglobin A1c; UA, uric acid

*P* value: \**P* < 0.05, \*\**P* < 0.01

**Supplementary Table S5. Correlation coefficients of each clinical factor from the results of path model A**

---

|        |   |         |                      |
|--------|---|---------|----------------------|
| Age    | ↔ | Gender  | -0.205 <sup>**</sup> |
|        | ↔ | BMI     | -0.255 <sup>**</sup> |
|        | ↔ | TG      | -0.172 <sup>**</sup> |
|        | ↔ | Smoking | -0.186 <sup>**</sup> |
|        | ↔ | AO sys  | 0.233 <sup>**</sup>  |
|        | ↔ | eGFR    | -0.466 <sup>**</sup> |
|        | ↔ | HbA1c   | 0.080 <sup>**</sup>  |
|        | ↔ | UA      | -0.044               |
| Gender | ↔ | BMI     | 0.137 <sup>**</sup>  |
|        | ↔ | TG      | 0.056 <sup>*</sup>   |
|        | ↔ | Smoking | 0.274 <sup>**</sup>  |
|        | ↔ | AO sys  | -0.211 <sup>**</sup> |
|        | ↔ | eGFR    | 0.095 <sup>**</sup>  |
|        | ↔ | HbA1c   | 0.013                |
|        | ↔ | UA      | 0.164 <sup>**</sup>  |
| BMI    | ↔ | TG      | 0.174 <sup>**</sup>  |
|        | ↔ | Smoking | 0.039                |
|        | ↔ | AO sys  | 0.035                |
|        | ↔ | eGFR    | 0.028                |
|        | ↔ | HbA1c   | 0.200 <sup>**</sup>  |
|        | ↔ | UA      | 0.185 <sup>**</sup>  |
| TG     | ↔ | Smoking | 0.187 <sup>**</sup>  |
|        | ↔ | AO sys  | 0.049                |
|        | ↔ | eGFR    | 0.052                |
|        | ↔ | HbA1c   | 0.098 <sup>**</sup>  |

|         |   |        |                      |
|---------|---|--------|----------------------|
|         | ↔ | UA     | 0.166 <sup>**</sup>  |
| Smoking | ↔ | AO sys | -0.046               |
|         | ↔ | eGFR   | 0.129 <sup>**</sup>  |
|         | ↔ | HbA1c  | 0.070 <sup>**</sup>  |
|         | ↔ | UA     | 0.080 <sup>**</sup>  |
| AO sys  | ↔ | eGFR   | -0.203 <sup>**</sup> |
|         | ↔ | HbA1c  | 0.056 <sup>*</sup>   |
|         | ↔ | UA     | -0.060 <sup>*</sup>  |
| eGFR    | ↔ | HbA1c  | 0.027                |
|         | ↔ | UA     | -0.288 <sup>**</sup> |
| HbA1c   | ↔ | UA     | -0.033               |

---

*P* value: <sup>\*</sup>*P* < 0.05, <sup>\*\*</sup>*P* < 0.01

BMI, body mass index; TG, triglycerides; AO sys, Systolic blood pressure in the Aorta; eGFR, estimated glomerular filtration rate; HbA1c, hemoglobin A1c; UA, uric acid; LVEF, left ventricular ejection fraction

**Supplementary Table S6. Correlation coefficients of each clinical factor from the results of path model B**

---

|        |   |         |                      |
|--------|---|---------|----------------------|
| Age    | ↔ | Gender  | -0.205 <sup>**</sup> |
|        | ↔ | BMI     | -0.255 <sup>**</sup> |
|        | ↔ | TG      | -0.172 <sup>**</sup> |
|        | ↔ | AO sys  | 0.234 <sup>**</sup>  |
|        | ↔ | Smoking | -0.186 <sup>**</sup> |
|        | ↔ | eGFR    | -0.466 <sup>**</sup> |
|        | ↔ | HbA1c   | 0.081 <sup>**</sup>  |
|        | ↔ | LVEF    | 0.067 <sup>*</sup>   |
| Gender | ↔ | BMI     | 0.137 <sup>**</sup>  |
|        | ↔ | TG      | 0.056 <sup>*</sup>   |
|        | ↔ | AO sys  | -0.211 <sup>**</sup> |
|        | ↔ | Smoking | 0.274 <sup>**</sup>  |
|        | ↔ | eGFR    | 0.095 <sup>**</sup>  |
|        | ↔ | HbA1c   | 0.014                |
|        | ↔ | LVEF    | -0.110 <sup>**</sup> |
| BMI    | ↔ | TG      | 0.174 <sup>**</sup>  |
|        | ↔ | AO sys  | 0.034                |
|        | ↔ | Smoking | 0.039                |
|        | ↔ | eGFR    | 0.028                |
|        | ↔ | HbA1c   | 0.200 <sup>**</sup>  |
|        | ↔ | LVEF    | 0.053                |
| TG     | ↔ | AO sys  | 0.049                |
|        | ↔ | Smoking | 0.187 <sup>**</sup>  |
|        | ↔ | eGFR    | 0.052                |



|         |   |         |                      |
|---------|---|---------|----------------------|
|         | ↔ | HbA1c   | 0.098 <sup>**</sup>  |
|         | ↔ | LVEF    | 0.048                |
| AO sys  | ↔ | Smoking | -0.043               |
|         | ↔ | eGFR    | -0.204 <sup>**</sup> |
|         | ↔ | HbA1c   | 0.056 <sup>*</sup>   |
|         | ↔ | LVEF    | 0.128 <sup>**</sup>  |
| Smoking | ↔ | eGFR    | 0.129 <sup>**</sup>  |
|         | ↔ | HbA1c   | 0.071 <sup>**</sup>  |
|         | ↔ | LVEF    | -0.089 <sup>**</sup> |
| eGFR    | ↔ | HbA1c   | 0.026                |
|         | ↔ | LVEF    | 0.127 <sup>**</sup>  |
| HbA1c   | ↔ | LVEF    | -0.077 <sup>**</sup> |

---

*P* value: <sup>\*</sup>*P* < 0.05, <sup>\*\*</sup>*P* < 0.01

UA, uric acid; BMI, body mass index; TG, triglycerides; AO sys, Systolic blood pressure in the Aorta; eGFR, estimated glomerular filtration rate; HbA1c, hemoglobin A1c; LVEF, left ventricular ejection fraction

**Supplementary Table S7. The results of path model C**

| Clinical Factor               |                      | Estimate | Standard error | Test statistic | P-Value | Standard regression coefficient<br>Direct Effect |
|-------------------------------|----------------------|----------|----------------|----------------|---------|--------------------------------------------------|
| UA<br>(R <sup>2</sup> =0.046) | ← UA lowering agents | 0.127    | 0.098          | 1.297          | 0.195   | 0.035                                            |
|                               | ← Diuretics          | 0.521    | 0.099          | 5.291          | < 0.001 | 0.147                                            |
|                               | ← LVEF               | -0.014   | 0.004          | -3.648         | < 0.001 | -0.108                                           |

The results (direct effect) of the path model theoretically proposed analysis to identify the clinical factors influencing between each other (see Supplementary Fig.S1)

R<sup>2</sup>: squared multiple correlations.

**Correlation coefficients of each clinical factor**

|                    |   |           |                      |
|--------------------|---|-----------|----------------------|
| UA lowering agents | ↔ | Diuretics | 0.174 <sup>**</sup>  |
|                    | ↔ | LVEF      | -0.115 <sup>**</sup> |
| Diuretics          | ↔ | LVEF      | -0.286 <sup>**</sup> |

P value: <sup>\*\*</sup>P < 0.01

UA, uric acid; LVEF, left ventricular ejection fraction

## Supplementary Figure Legend

### Supplementary Figure S1. The path model [C]: An explanatory drawing of the possible cascade from the medication profiles to UA

This path has a coefficient showing the standardized coefficient of a regressing independent variable on a dependent variable of the relevant path. These variables indicate standardized regression coefficients (direct effect) [**bold typeface indicates remarkable values**], squared multiple correlations [*narrow italics*] and correlations among exogenous variables [green].

## Path model C

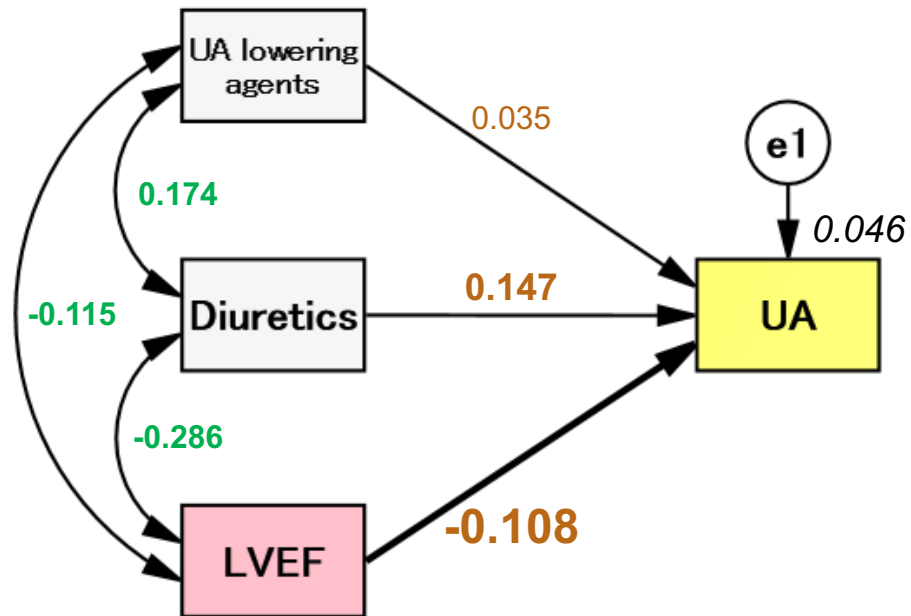

Supplement: 41598_2017_2707_MOESM1_ESM.pdf [file 41598_2017_2707_MOESM1_ESM.pdf]
